# Supplementary material for: Marijuana’s Impact On Implant-based Breast Reconstruction: A Retrospective Cohort Study
Source: PubMed Central journal article supplement — Plast Reconstr Surg Glob Open. 2024 Aug 21;12(8):e6082. doi: 10.1097/GOX.0000000000006082 (PMC11338254; doi:10.1097/gox.0000000000006082), 2024-08-21
Supplement: gox-12-e6082-s001.pdf [file gox-12-e6082-s001.pdf]

**Supplemental Digital Content 1. Peri and Post Operative Complications**

|                                                   |     | All Patients<br>(N = 243) | Marijuana Use           |                    | Comparison<br>p-value |
|---------------------------------------------------|-----|---------------------------|-------------------------|--------------------|-----------------------|
|                                                   |     |                           | Non-Active<br>(N = 231) | Active<br>(N = 12) |                       |
| Full Thickness Skin<br>Necrosis                   | No  | 213 (87.7%)               | 204 (88.3%)             | 9 (75.0%)          | 0.17                  |
|                                                   | Yes | 30 (12.3%)                | 27 (11.7%)              | 3 (25.0%)          |                       |
| Cellulitis, Treated with<br>Oral Abx              | No  | 224 (92.2%)               | 213 (92.2%)             | 11 (91.7%)         | >0.99                 |
|                                                   | Yes | 19 (7.8%)                 | 18 (7.8%)               | 1 (8.3%)           |                       |
| Cellulitis, Treated with<br>Intravenous Abx       | No  | 218 (89.7%)               | 211 (91.3%)             | 7 (58.3%)          | 0.004 *               |
|                                                   | Yes | 25 (10.3%)                | 20 (8.7%)               | 5 (41.7%)          |                       |
| Explantation for<br>Infection                     | No  | 218 (89.7%)               | 211 (91.3%)             | 7 (58.3%)          | 0.004 *               |
|                                                   | Yes | 25 (10.3%)                | 20 (8.7%)               | 5 (41.7%)          |                       |
| Explantation for<br>Exposure                      | No  | 227 (93.4%)               | 216 (93.5%)             | 11 (91.7%)         | .57                   |
|                                                   | Yes | 16 (6.6%)                 | 15 (6.5%)               | 1 (8.3%)           |                       |
| Explantation/Exchange<br>for Capsular Contracture | No  | 229 (94.2%)               | 218 (94.4%)             | 11 (91.7%)         | 0.52                  |
|                                                   | Yes | 14 (5.8%)                 | 13 (5.6%)               | 1 (8.3%)           |                       |
| Capsular Contracture                              | No  | 204 (84.0%)               | 195 (84.4%)             | 9 (75.0%)          | 0.42                  |
|                                                   | Yes | 39 (16.0%)                | 36 (15.6%)              | 3 (25.0%)          |                       |
| Hematoma                                          | No  | 230 (94.7%)               | 220 (95.2%)             | 10 (8.3%)          | 0.074                 |

|                                                                     |     |             |             |             |          |
|---------------------------------------------------------------------|-----|-------------|-------------|-------------|----------|
|                                                                     | Yes | 13 (5.3%)   | 11 (4.8%)   | 2 (1.7%)    |          |
| Seroma                                                              | No  | 226 (93.0%) | 214 (92.6%) | 12 (100.0%) | >0.99    |
|                                                                     | Yes | 17 (7.0%)   | 17 (7.4%)   | 0 (0.0%)    |          |
| Superficial Wounds                                                  | No  | 229 (94.2%) | 217 (93.9%) | 12 (100.0%) | >0.99    |
|                                                                     | Yes | 14 (5.8%)   | 14 (6.1%)   | 0 (0.0%)    |          |
| Flipped Implant                                                     | No  | 235 (96.7%) | 224 (97.0%) | 11 (91.7%)  | 0.34     |
|                                                                     | Yes | 8 (3.3%)    | 7 (3.0%)    | 1 (8.3%)    |          |
| Number of Revisions                                                 | <3  | 233 (95.9%) | 221 (95.7%) | 12 (100.0%) | >0.99    |
|                                                                     | ≥3  | 10 (4.1%)   | 10 (4.3%)   | 0 (0.0%)    |          |
| Pocket Change from Sub to Pre-Pectoral                              | No  | 237 (97.5%) | 226 (97.8%) | 11 (91.7%)  | 0.26     |
|                                                                     | Yes | 6 (2.5%)    | 5 (2.2%)    | 1 (8.3%)    |          |
| Emergency Department Visit                                          | No  | 204 (84.0%) | 197 (85.3%) | 7 (58.3%)   | 0.028 *  |
|                                                                     | Yes | 39 (16.0%)  | 34 (14.7%)  | 5 (41.7%)   |          |
| Hospital Readmission                                                | No  | 215 (88.5%) | 207 (89.6%) | 8 (66.7%)   | 0.037 *  |
|                                                                     | Yes | 28 (11.5%)  | 24 (10.4%)  | 4 (33.3%)   |          |
| Back to OR within 90 days                                           | No  | 195 (80.2%) | 191 (82.7%) | 4 (33.3%)   | <0.001 * |
|                                                                     | Yes | 48 (19.8%)  | 40 (17.3%)  | 8 (66.7%)   |          |
| Categorical or ordered data is given as Frequency (Column Percent). |     |             |             |             |          |
| * P-value < 0.05                                                    |     |             |             |             |          |

Abx – antibiotics

IR – Interventional Radiology
